# A Novel Protective MHC-I Haplotype Not Associated with Dominant Gag-Specific CD8<sup>+</sup> T-Cell Responses in SIVmac239 Infection of Burmese Rhesus Macaques

Naofumi Takahashi<sup>1,2</sup>, Takushi Nomura<sup>1,2</sup>, Yusuke Takahara<sup>1,2</sup>, Hiroyuki Yamamoto<sup>1</sup>, Teiichiro Shiino<sup>1</sup>, Akiko Takeda<sup>1</sup>, Makoto Inoue<sup>3</sup>, Akihiro Iida<sup>3</sup>, Hiroto Hara<sup>3</sup>, Tsugumine Shu<sup>3</sup>, Mamoru Hasegawa<sup>3</sup>, Hiromi Sakawaki<sup>4</sup>, Tomoyuki Miura<sup>4</sup>, Tatsuhiko Igarashi<sup>4</sup>, Yoshio Koyanagi<sup>4</sup>, Taeko K. Naruse<sup>5</sup>, Akinori Kimura<sup>5</sup>, Tetsuro Matano<sup>1,2\*</sup>

**1** AIDS Research Center, National Institute of Infectious Diseases, Tokyo, Japan, **2** The Institute of Medical Science, The University of Tokyo, Tokyo, Japan, **3** DNAVEC Corporation, Tsukuba, Japan, **4** Institute for Virus Research, Kyoto University, Kyoto, Japan, **5** Department of Molecular Pathogenesis, Medical Research Institute, Tokyo Medical and Dental University, Tokyo, Japan

## Abstract

Several major histocompatibility complex class I (MHC-I) alleles are associated with lower viral loads and slower disease progression in human immunodeficiency virus (HIV) and simian immunodeficiency virus (SIV) infections. Immune-correlates analyses in these MHC-I-related HIV/SIV controllers would lead to elucidation of the mechanism for viral control. Viral control associated with some protective MHC-I alleles is attributed to CD8<sup>+</sup> T-cell responses targeting Gag epitopes. We have been trying to know the mechanism of SIV control in multiple groups of Burmese rhesus macaques sharing MHC-I genotypes at the haplotype level. Here, we found a protective MHC-I haplotype, *90-010-Id* (D), which is not associated with dominant Gag-specific CD8<sup>+</sup> T-cell responses. Viral loads in five D<sup>+</sup> animals became significantly lower than those in our previous cohorts after 6 months. Most D<sup>+</sup> animals showed predominant Nef-specific but not Gag-specific CD8<sup>+</sup> T-cell responses after SIV challenge. Further analyses suggested two Nef-epitope-specific CD8<sup>+</sup> T-cell responses exerting strong suppressive pressure on SIV replication. Another set of five D<sup>+</sup> animals that received a prophylactic vaccine using a Gag-expressing Sendai virus vector showed significantly reduced viral loads compared to unvaccinated D<sup>+</sup> animals at 3 months, suggesting rapid SIV control by Gag-specific CD8<sup>+</sup> T-cell responses in addition to Nef-specific ones. These results present a pattern of SIV control with involvement of non-Gag antigen-specific CD8<sup>+</sup> T-cell responses.

**Citation:** Takahashi N, Nomura T, Takahara Y, Yamamoto H, Shiino T, et al. (2013) A Novel Protective MHC-I Haplotype Not Associated with Dominant Gag-Specific CD8<sup>+</sup> T-Cell Responses in SIVmac239 Infection of Burmese Rhesus Macaques. PLoS ONE 8(1): e54300. doi:10.1371/journal.pone.0054300

**Editor:** Douglas F. Nixon, University of California San Francisco, United States of America

**Received:** November 13, 2012; **Accepted:** December 10, 2012; **Published:** January 14, 2013

**Copyright:** © 2013 Takahashi et al. This is an open-access article distributed under the terms of the Creative Commons Attribution License, which permits unrestricted use, distribution, and reproduction in any medium, provided the original author and source are credited.

**Funding:** This work was supported by grants-in-aid from the Ministry of Education, Culture, Sports, Science, and Technology, and grants-in-aid from the Ministry of Health, Labor, and Welfare. The funders had no role in study design, data collection and analysis, decision to publish, or preparation of the manuscript.

**Competing Interests:** Makoto Inoue, Akihiro Iida, Hiroto Hara, Tsugumine Shu and Mamoru Hasegawa are employed by DNAVEC Corporation. There are no patents, products in development or marketed products to declare. This does not alter the authors' adherence to all the PLOS ONE policies on sharing data and materials, as detailed online in the guide for authors.

\* E-mail: tmatano@nih.gov.jp

## Introduction

Virus-specific CD8<sup>+</sup> T-cell responses play a central role in the control of human immunodeficiency virus (HIV) and simian immunodeficiency virus (SIV) replication [1,2,3,4,5]. Genetic diversities of HLA or major histocompatibility complex class I (MHC-I) result in various patterns of CD8<sup>+</sup> T-cell responses in HIV-infected individuals. Cumulative studies on HIV infection have indicated the association of MHC-I genotypes with higher or lower viral loads [6,7,8,9,10]. In some MHC-I alleles associating with lower viral loads and slower disease progression, certain CD8<sup>+</sup> T-cell responses restricted by these MHC-I molecules have been shown to be responsible for HIV control [11,12,13]. In rhesus macaque AIDS models, *Mamu-A\*01*, *Mamu-B\*08*, and *Mamu-B\*17* are known as protective alleles, and macaques possessing these alleles tend to show slower disease progression after SIVmac251/SIVmac239 challenge [14,15,16,17].

Recent studies have indicated great contribution of CD8<sup>+</sup> T-cell responses targeting Gag epitopes to reduction in viral loads in HIV/SIV infection [18,19,20,21]. Viral control associated with some protective MHC-I alleles is attributed to Gag epitope-specific CD8<sup>+</sup> T-cell responses [22,23,24]. For instance, CD8<sup>+</sup> T-cell responses specific for the HLA-B\*57-restricted Gag<sub>240–249</sub> TW10 and HLA-B\*27-restricted Gag<sub>263–272</sub> KK10 epitopes exert strong suppressive pressure on HIV replication and frequently select for an escape mutation with viral fitness costs, leading to lower viral loads [22,24,25,26,27]. On the other hand, CD8<sup>+</sup> T-cell responses targeting SIV antigens other than Gag, such as Mamu-B\*08- or Mamu-B\*17-restricted Vif and Nef epitopes, have been indicated to exert strong suppressive pressure on SIV replication [28,29,30,31,32,33]. Accumulation of our knowledge on the potential of these non-Gag-specific as well as Gag-specific CD8<sup>+</sup> T-cell responses for HIV/SIV control should be encouraged for elucidation of viral control mechanisms.

We have been examining SIVmac239 infection in multiple groups of Burmese rhesus macaques sharing MHC-I genotypes at the haplotype level and indicated an association of MHC-I haplotypes with AIDS progression [21,34]. In our previous study, a group of macaques sharing MHC-I haplotype *90-120-Ia* (A)

induced dominant Gag-specific CD8<sup>+</sup> T-cell responses and tended to show slower disease progression after SIVmac239 challenge [21]. Prophylactic immunization of these A<sup>+</sup> macaques with a DNA vaccine prime and a Gag-expressing Sendai virus (SeV-Gag) vector boost resulted in SIV control based on Gag-specific CD8<sup>+</sup>

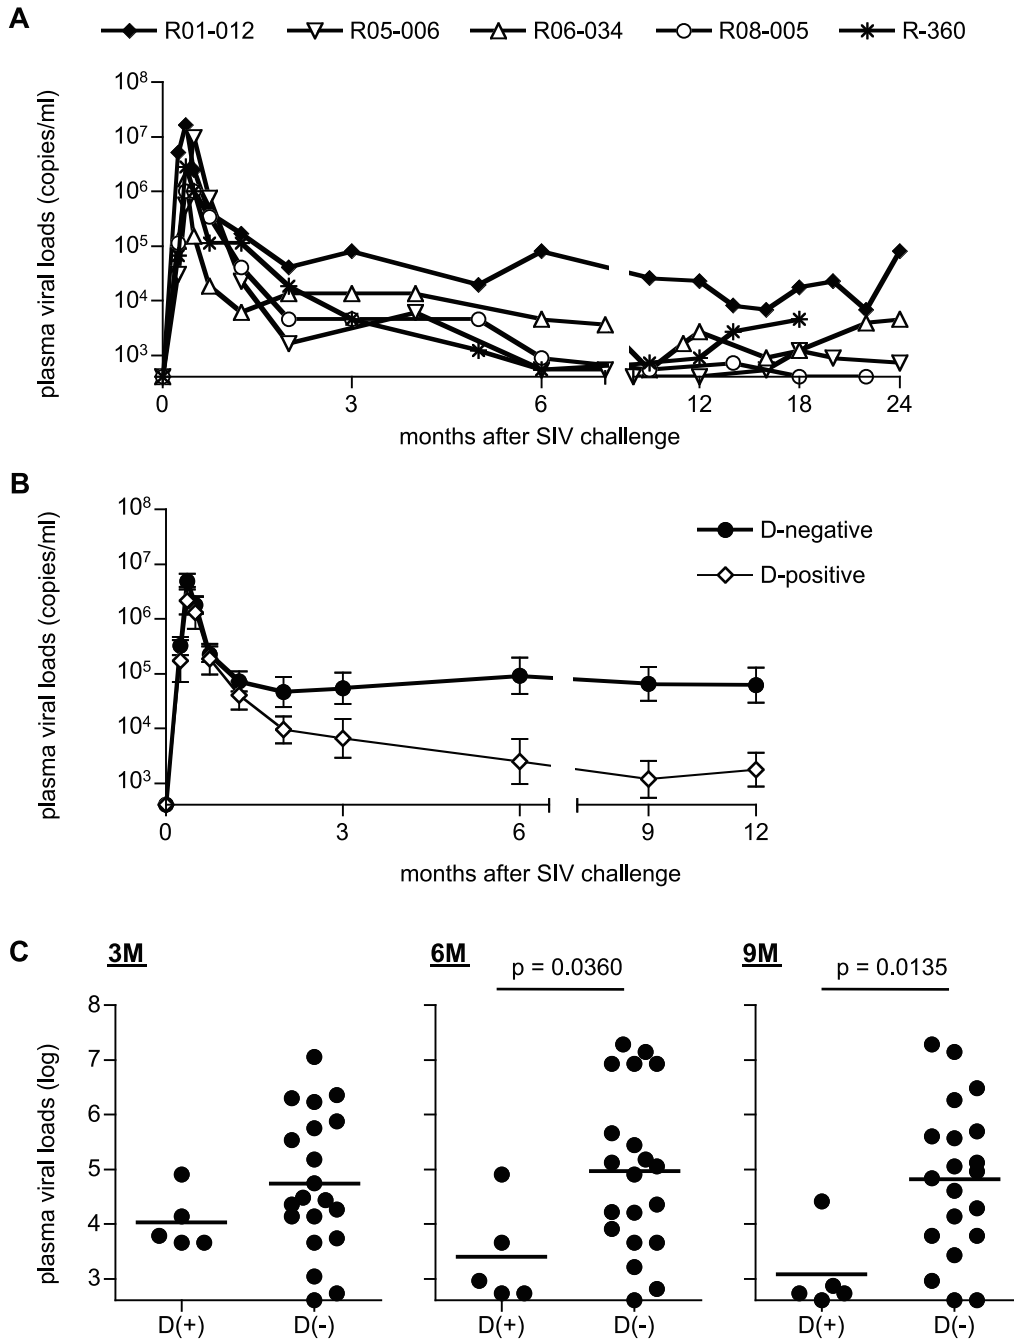

**Figure 1. Plasma viral loads after SIVmac239 challenge in unvaccinated macaques.** Plasma viral loads (SIV gag RNA copies/ml plasma) were determined as described previously [35]. The lower limit of detection is approximately  $4 \times 10^2$  copies/ml. (A) Changes in plasma viral loads after challenge in unvaccinated macaques possessing MHC-I haplotype D. (B) Changes in geometric means of plasma viral loads after challenge in five unvaccinated D<sup>+</sup> animals in the present study and twenty D<sup>-</sup> animals in our previous cohorts [21]. Three of twenty D<sup>-</sup> animals were euthanized because of AIDS before 12 months, and we compared viral loads between D<sup>+</sup> and D<sup>-</sup> animals until 12 months. (C) Comparison of plasma viral loads at 3 months (left panel), 6 months (middle panel), and 9 months (right panel) between the unvaccinated D<sup>+</sup> and the D<sup>-</sup> animals. Viral loads at 6 months and 9 months in D<sup>+</sup> animals were significantly lower than those in the latter D<sup>-</sup> animals ( $p = 0.0360$  at 6 months and  $p = 0.0135$  at 9 months by t-test).

doi:10.1371/journal.pone.0054300.g001

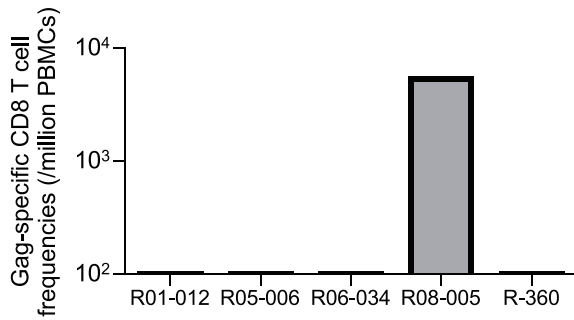

**Figure 2. SIV Gag-specific CD8<sup>+</sup> T-cell responses in unvaccinated D<sup>+</sup> macaques at week 2 after SIVmac239 challenge.**  
doi:10.1371/journal.pone.0054300.g002

T-cell responses [35,36]. Accumulation of data on interaction between virus replication and T-cell responses in multiple groups of macaques sharing individual MHC-I haplotypes would provide great insights into our understanding of the mechanism for HIV/SIV control.

In the present study, we investigated SIVmac239 infection of a group of Burmese rhesus macaques possessing the MHC-I haplotype *90-010-Id* (D), which was not associated with dominant Gag-specific CD8<sup>+</sup> T-cell responses. These animals had persistent viremia in the early phase but showed significant reduction of viral loads around 6 months after SIV challenge. Most D<sup>+</sup> animals showed predominant Nef-specific but not Gag-specific CD8<sup>+</sup> T-cell responses. This study presents a protective MHC-I haplotype, indicating the potential of non-Gag antigen-specific CD8<sup>+</sup> T-cell responses to contribute to SIV control.

## Materials and Methods

### Ethics Statement

Animal experiments were carried out in National Institute of Biomedical Innovation (NIBP) and Institute for Virus Research in Kyoto University (IVRKU) after approval by the Committee on the Ethics of Animal Experiments of NIBP and IVRKU in accordance with the guidelines for animal experiments at NIBP, IVRKU, and National Institute of Infectious Diseases. To prevent viral transmission, animals were housed in individual cages allowing them to make sight and sound contact with one another, where the temperature was kept at 25°C with light in 12 hours per day. Animals were fed with apples and commercial monkey diet (Type CMK-2, Clea Japan, Inc. Tokyo). Blood collection, vaccination, and SIV challenge were performed under ketamine anesthesia. The endpoint for euthanasia was determined by typical signs of AIDS including reduction in peripheral CD4<sup>+</sup> T-cell counts (less than 200 cells/ $\mu$ l), 10% loss of body weight, diarrhea, and general weakness. At euthanasia, animals were deeply anesthetized with pentobarbital under ketamine anesthesia, and then, whole blood was collected from left ventricle.

### Animal Experiments

We examined SIV infections in a group of Burmese rhesus macaques ( $n = 10$ ) sharing the MHC-I haplotype *90-010-Id* (D). The determination of MHC-I haplotypes was based on the family study in combination with the reference strand-mediated conformation analysis (RSCA) of *Mamu-A* and *Mamu-B* genes and detection of major *Mamu-A* and *Mamu-B* alleles by cloning the reverse transcription (RT)-PCR products as described previously [21,34,37]. Macaques R01-012 and R01-009 used in our previous report [35] and macaques R03-021 and R03-016 used in an

unpublished experiment were included in the present study. Five macaques R01-009, R06-020, R06-033, R03-021, and R03-016 received a prophylactic DNA prime/SeV-Gag boost vaccine (referred to as DNA/SeV-Gag vaccine) [35]. The DNA used for the vaccination, CMV-SHIVdEN, was constructed from an *env*-deleted and *nef*-deleted simian-human immunodeficiency virus SHIVMD14YE [38] molecular clone DNA (SIVGPI) and has the genes encoding SIVmac239 Gag, Pol, Vif, and Vpx, and HIV Tat and Rev. At the DNA vaccination, animals received 5 mg of CMV-SHIVdEN DNA intramuscularly. Six weeks after the DNA prime, animals received a single boost intranasally with  $6 \times 10^9$  cell infectious units (CIUs) of F-deleted replication-defective SeV-Gag [39,40]. All animals were challenged intravenously with 1,000 TCID<sub>50</sub> (50 percent tissue culture infective doses) of SIVmac239 [41]. At week 1 after SIV challenge, macaque R03-021 was inoculated with nonspecific immunoglobulin G (IgG) and macaques R03-016 with IgG purified from neutralizing antibody-positive plasma of chronically SIV-infected macaques in our previous experiment [42].

### Analysis of SIV Antigen-specific CD8<sup>+</sup> T-cell Responses

SIV antigen-specific CD8<sup>+</sup> T-cell responses were measured by flow-cytometric analysis of gamma interferon (IFN- $\gamma$ ) induction as described previously [43]. Autologous herpesvirus papio-immortalized B-lymphoblastoid cell lines (B-LCLs) were established from peripheral blood mononuclear cells (PBMCs) which were obtained from individual macaques before SIV challenge [44]. PBMCs obtained from SIV-infected macaques were cocultured with autologous B-LCLs pulsed with peptides or peptide pools using panels of overlapping peptides spanning the entire SIVmac239 Gag, Pol, Vif, Vpx, Vpr, Tat, Rev, Env, and Nef amino acid sequences. Alternatively, PBMCs were cocultured with B-LCLs infected with a vaccinia virus vector expressing SIVmac239 Gag for Gag-specific stimulation. Intracellular IFN- $\gamma$  staining was performed using CytotfixCytoperm kit (BD, Tokyo, Japan). Fluorescein isothiocyanate-conjugated anti-human CD4 (BD), Peridinin chlorophyll protein (PerCP)-conjugated anti-human CD8 (BD), allophycocyanin Cy7 (APC-Cy7)-conjugated anti-human CD3 (BD), and phycoerythrin (PE)-conjugated anti-human IFN- $\gamma$  antibodies (Biolegend, San Diego, CA) were used. Specific T-cell levels were calculated by subtracting non-specific IFN- $\gamma$ <sup>+</sup> T-cell frequencies from those after peptide-specific stimulation. Specific T-cell levels less than 100 cells per million PBMCs were considered negative.

### Sequencing Analysis of Plasma Viral Genomes

Viral RNAs were extracted using High Pure Viral RNA kit (Roche Diagnostics, Tokyo, Japan) from macaque plasma samples. Fragments of cDNAs encoding SIVmac239 Gag and Nef were amplified by nested RT-PCR from plasma RNAs and subjected to direct sequencing by using dye terminator chemistry and an automated DNA sequencer (Applied Biosystems, Tokyo, Japan) as described before [45]. Predominant non-synonymous mutations were determined.

### Statistical Analysis

Statistical analysis was performed using Prism software version 4.03 with significance levels set at a P value of <0.050 (GraphPad Software, Inc., San Diego, CA). Plasma viral loads were log transformed and compared by an unpaired two-tailed t test.

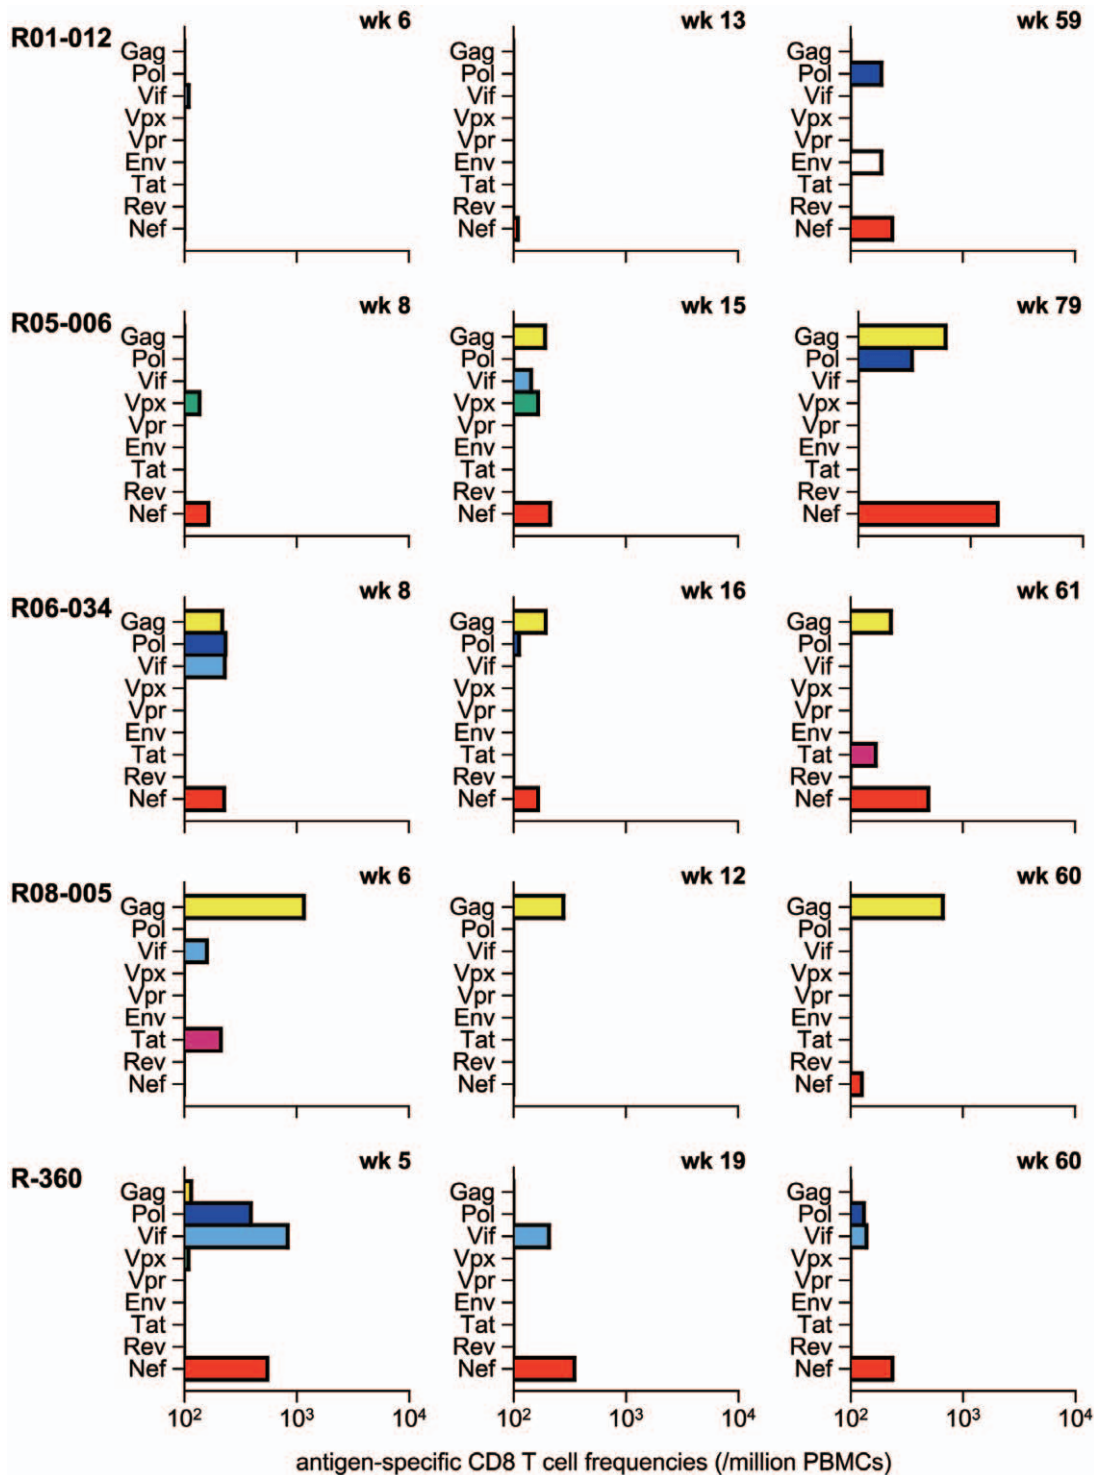

**Figure 3. SIV antigen-specific CD8<sup>+</sup> T-cell responses in unvaccinated D<sup>+</sup> macaques.** Responses were measured by the detection of antigen-specific IFN- $\gamma$  induction in PBMCs obtained at indicated time points after SIVmac239 challenge. doi:10.1371/journal.pone.0054300.g003

**Results**

**Lower Viral Loads in D<sup>+</sup> Macaques in the Chronic Phase of SIV Infection**

We first investigated SIVmac239 infection of five unvaccinated Burmese rhesus macaques sharing the MHC-I haplotype D

(referred to as D<sup>+</sup> macaques). Confirmed MHC-I alleles consisting of this haplotype is *Mamu-A1\*032:02*, *Mamu-B\*004:01*, and *Mamu-B\*102:01:01*. These animals showed lower set-point plasma viral loads (Fig. 1). Comparison of plasma viral loads between these five animals and our previous cohorts of SIVmac239-infected Burmese D-negative (D<sup>-</sup>) rhesus macaques (n = 20) [21] revealed no

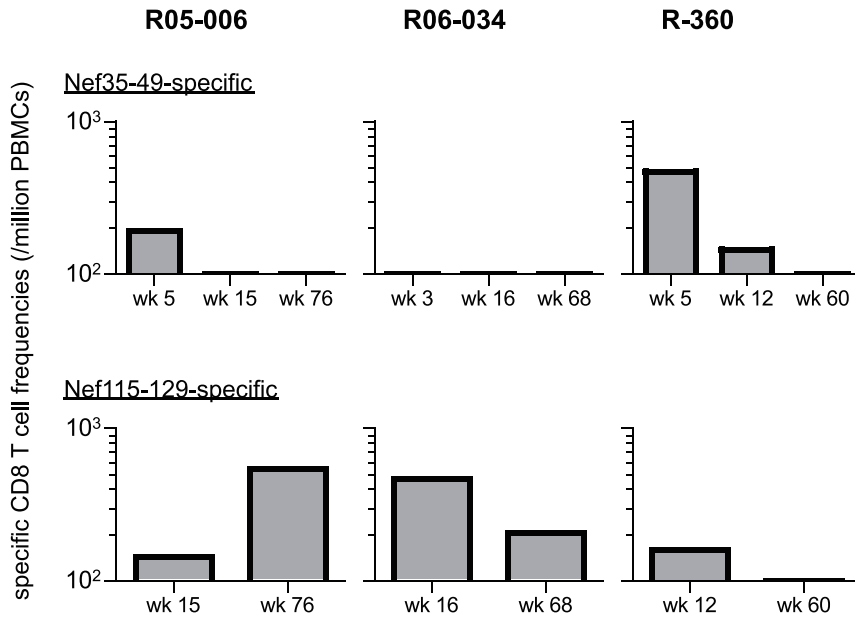

**Figure 4. SIV Nef-specific CD8<sup>+</sup> T-cell responses in macaques R05-006, R06-034, and R-360.** Nef<sub>35-49</sub>-specific (upper panels) and Nef<sub>115-129</sub>-specific (lower panels) CD8<sup>+</sup> T-cell responses were examined at indicated time points after SIVmac239 challenge. doi:10.1371/journal.pone.0054300.g004

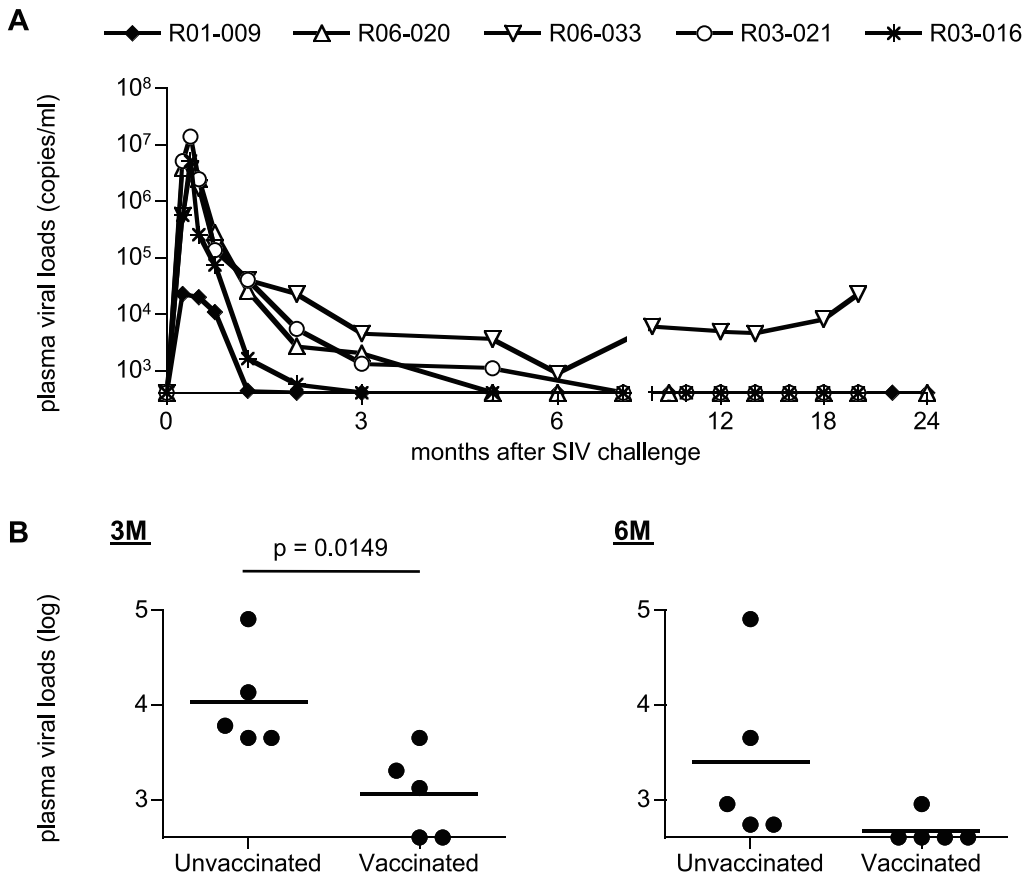

**Figure 5. Plasma viral loads after SIVmac239 challenge in vaccinated D<sup>+</sup> macaques.** (A) Changes in plasma viral loads after challenge vaccinated macaques possessing MHC-I haplotype D. (B) Comparison of plasma viral loads at 3 months (left panel) and 6 months (right panel) between five unvaccinated D<sup>+</sup> and five vaccinated D<sup>+</sup> animals. Viral loads at 3 months in vaccinated animals were significantly lower than those in the unvaccinated ( $p = 0.0149$  by *t*-test). doi:10.1371/journal.pone.0054300.g005

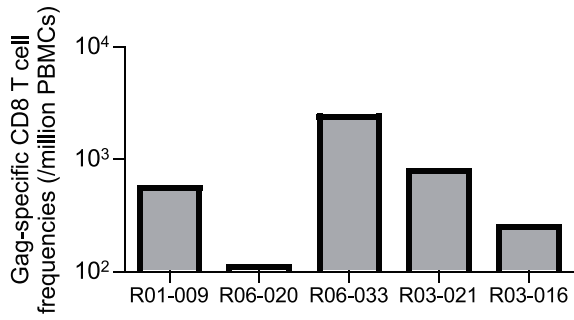

**Figure 6. SIV Gag-specific CD8<sup>+</sup> T-cell responses in vaccinated D<sup>+</sup> macaques at week 2 after SIVmac239 challenge.**  
doi:10.1371/journal.pone.0054300.g006

significant difference at 3 months after SIV challenge ( $p = 0.2436$  by t-test), but viral loads in the former D<sup>+</sup> animals became significantly lower than the latter after 6 months ( $p = 0.0360$  at 6 months and  $p = 0.0135$  at 9 months by t-test; Fig. 1). Four of these five macaques sharing MHC-I haplotype D showed low viral loads, less than  $5 \times 10^3$  copies/ml, after 6 months, whereas macaque R01-012 maintained relatively higher viral loads.

**Predominant Nef-specific CD8<sup>+</sup> T-cell Responses**

We examined SIV antigen-specific CD8<sup>+</sup> T-cell responses by detection of antigen-specific IFN- $\gamma$  induction. In the very acute phase, we did not have enough PBMC samples for measurement of individual SIV antigen-specific CD8<sup>+</sup> T-cell responses and focused on examining Gag-specific CD8<sup>+</sup> T-cell responses in most animals. At week 2 after challenge, Gag-specific CD8<sup>+</sup> T-cell responses were undetectable in four of five animals (Fig. 2).

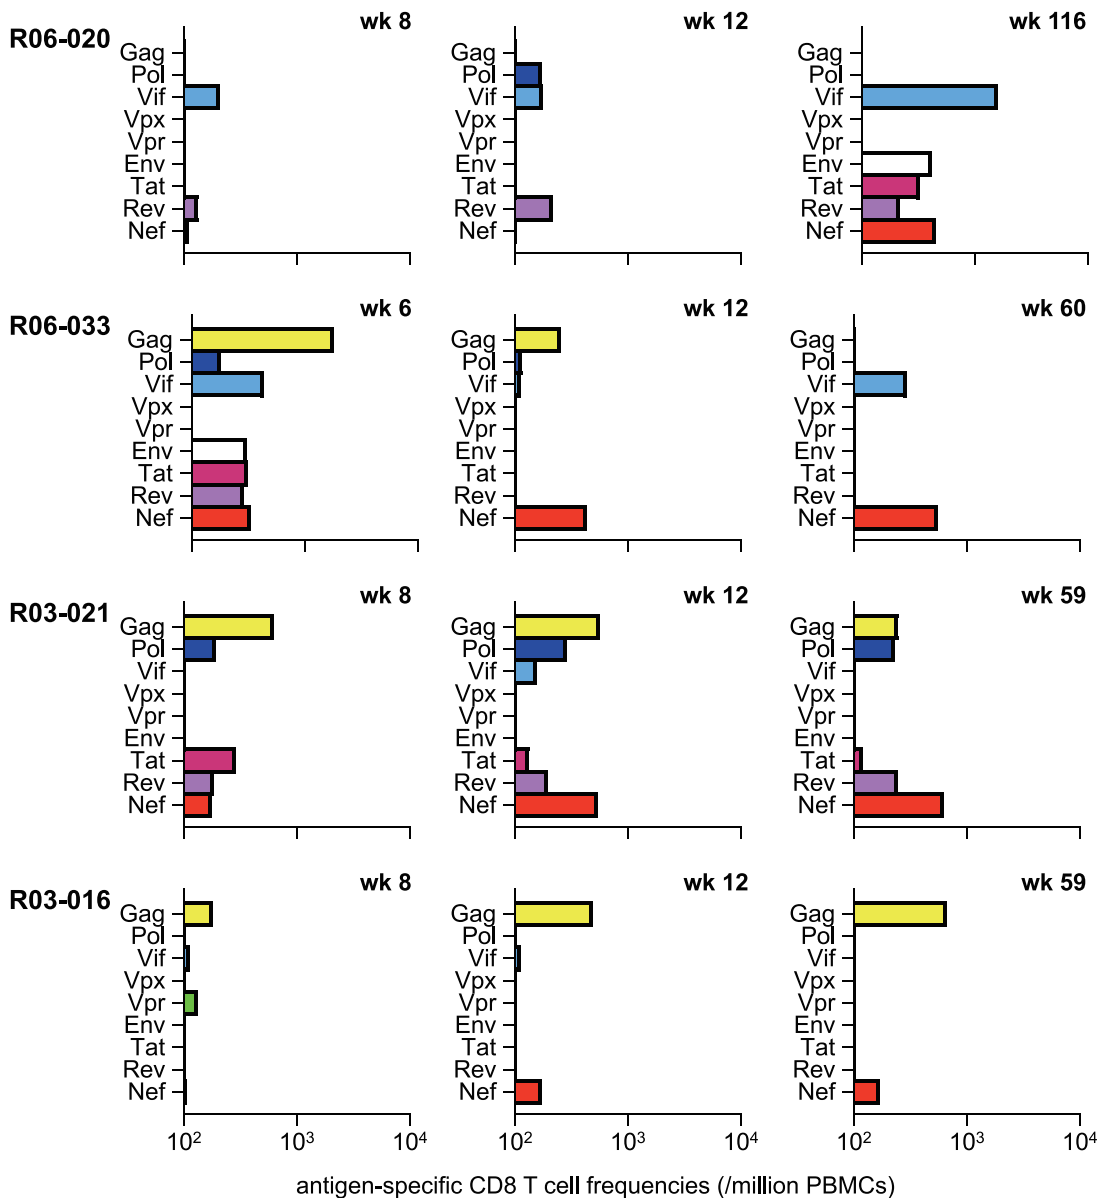

**Figure 7. SIV antigen-specific CD8<sup>+</sup> T-cell responses in vaccinated D<sup>+</sup> animals after SIVmac239 challenge.** Samples for this analysis were unavailable in macaque R01-009.  
doi:10.1371/journal.pone.0054300.g007

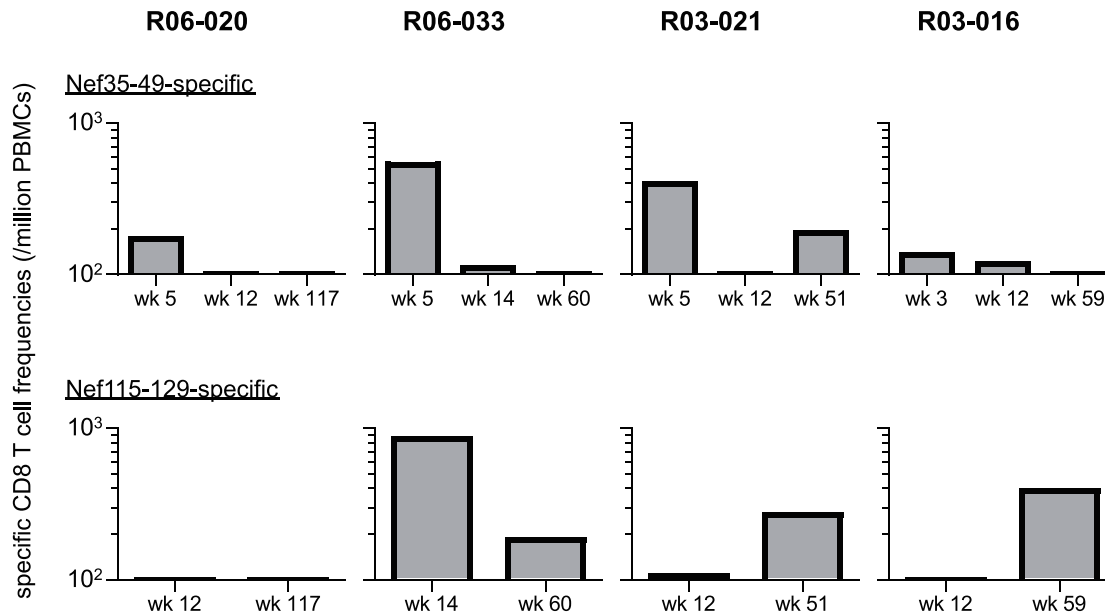

**Figure 8. SIV Nef-specific CD8<sup>+</sup> T-cell responses in macaques R06-020, R06-033, R03-021, and R03-016.** Nef<sub>35-49</sub>-specific (upper panels) and Nef<sub>115-129</sub>-specific (lower panels) CD8<sup>+</sup> T-cell responses were examined at indicated time points after SIVmac239 challenge. doi:10.1371/journal.pone.0054300.g008

We then examined CD8<sup>+</sup> T-cell responses specific for individual SIV antigens in the early and the late phases (Fig. 3). Nef-specific but not Gag-specific CD8<sup>+</sup> T-cell responses were predominant in most D<sup>+</sup> animals. Gag-specific CD8<sup>+</sup> T-cell responses were dominantly induced in macaque R08-005 showing very low set-point viral loads. Macaque R01-012 having higher viral loads showed poor CD8<sup>+</sup> T-cell responses in the early phase.

Among four D<sup>+</sup> animals controlling SIV replication with less than  $5 \times 10^3$  copies/ml of plasma viral loads after 6 months, Gag-specific CD8<sup>+</sup> T-cell responses were dominant only in macaque R08-005, while efficient Nef-specific CD8<sup>+</sup> T-cell responses were induced in the remaining three, suggesting possible contribution of Nef-specific CD8<sup>+</sup> T-cell responses to SIV control in these three controllers (R05-006, R06-034, and R-360). We then attempted to localize Nef CD8<sup>+</sup> T-cell epitopes shared in these animals and found Nef<sub>35-49</sub>-specific and Nef<sub>115-129</sub>-specific CD8<sup>+</sup> T-cell responses (Fig. 4), although we did not have enough samples for mapping the exact epitopes.

### Reduction of Viral Loads in the Early Phase of SIV Infection by Prophylactic Vaccination

We also investigated SIVmac239 infection of additional five, vaccinated Burmese rhesus macaques sharing the MHC-I haplotype D. These animals received a prophylactic DNA/SeV-Gag vaccination. In four of these five vaccinated macaques, plasma viremia became undetectable after 6 months, while macaque R06-033 showed persistent viremia (Fig. 5A). Difference in viral loads between unvaccinated and vaccinated D<sup>+</sup> animals was unclear in the acute phase, but the latter vaccinees showed significant reduction in viral loads compared to those in the former unvaccinated at 3 months ( $p = 0.0360$ ; Fig. 5B). After 6 months, unvaccinated animals also showed reduced viral loads, and the difference in viral loads between unvaccinated and vaccinated became unclear.

In contrast to unvaccinated D<sup>+</sup> animals, all five vaccinated animals elicited Gag-specific CD8<sup>+</sup> T-cell responses at week 2 after challenge (Fig. 6), reflecting the effect of prophylactic vaccination.

We then examined CD8<sup>+</sup> T-cell responses specific for individual SIV antigens in these vaccinated animals (Fig. 7). Samples for this analysis were unavailable in vaccinated macaque R01-009. Vaccinated animals except for macaque R06-020 showed dominant Gag-specific CD8<sup>+</sup> T-cell responses even at 1–2 months. However, Gag-specific CD8<sup>+</sup> T-cell responses became not dominant after 1 year, while Nef-specific or Vif-specific CD8<sup>+</sup> T-cell responses became predominant, instead, in most vaccinees except for macaque R03-016.

Like three unvaccinated macaques (R05-006, R06-034, and R-360), vaccinated D<sup>+</sup> animals induced Nef<sub>35-49</sub>-specific and Nef<sub>115-129</sub>-specific CD8<sup>+</sup> T-cell responses after SIV challenge (Fig. 8). In analyses of three unvaccinated (Fig. 4) and four vaccinated animals (Fig. 8), Nef<sub>35-49</sub>-specific CD8<sup>+</sup> T-cell responses were induced in the early phase in six animals but mostly became undetectable in the chronic phase. Nef<sub>115-129</sub>-specific CD8<sup>+</sup> T-cell responses were also induced in most animals except for macaque R06-020 which showed Nef<sub>112-126</sub>-specific ones in the chronic phase (data not shown). Macaques R05-006, R03-021, and R03-016 showed efficient Nef<sub>115-129</sub>-specific CD8<sup>+</sup> T-cell responses not in the early phase but in the chronic phase. In contrast, vaccinated animal R06-033 that failed to control viremia showed higher Nef<sub>115-129</sub>-specific CD8<sup>+</sup> T-cell responses in the early phase than those in the chronic phase.

### Selection of Mutations in Nef CD8<sup>+</sup> T-cell Epitope-coding Regions

To see the effect of selective pressure by Nef-specific CD8<sup>+</sup> T-cell responses on viral genome mutations, we next analyzed nucleotide sequences in viral *nef* cDNAs amplified from plasma RNAs obtained at several time points after SIV challenge. Nonsynonymous mutations detected predominantly in Nef<sub>35-49</sub>-coding and Nef<sub>115-129</sub>-coding regions were as shown in Fig. 9. Remarkably, all the unvaccinated and vaccinated D<sup>+</sup> animals showed rapid selection of mutations in the Nef<sub>35-49</sub>-coding region in 3 months. On the other hand, mutations in the Nef<sub>115-129</sub>-coding region were observed in the late phase in all the three

| Nef     |     | Nef <sub>35-49</sub> |    |    |    |    | Nef <sub>115-129</sub> |     |     |     |     |
|---------|-----|----------------------|----|----|----|----|------------------------|-----|-----|-----|-----|
|         |     | 36                   | 37 | 41 | 42 | 44 | 119                    | 122 | 124 | 125 | 126 |
|         |     | E                    | D  | Q  | S  | G  | M                      | F   | K   | E   | K   |
| R01-012 | 1M  |                      | *G |    |    |    |                        |     |     |     |     |
|         | 3M  |                      | *G |    |    |    |                        |     |     |     |     |
|         | 14M |                      | *G | *G |    |    |                        |     |     |     |     |
|         | 24M |                      | *G | *G |    | *E |                        |     |     |     |     |
| R05-006 | 1M  |                      |    |    |    | *E |                        |     |     |     |     |
|         | 3M  |                      |    | R  |    |    |                        |     |     |     |     |
|         | 16M |                      |    | R  |    |    |                        |     |     |     |     |
|         | 24M |                      |    | R  |    |    |                        |     |     |     | R   |
| R06-034 | 1M  |                      |    |    |    |    |                        |     |     |     |     |
|         | 3M  |                      | *G |    |    |    |                        |     |     |     |     |
|         | 10M |                      | *G | *G |    | *E |                        |     |     |     | *R  |
|         | 18M |                      | G  |    |    | E  |                        |     |     |     | R   |
| R08-005 | 1M  |                      |    |    |    |    |                        |     |     |     |     |
|         | 3M  |                      |    |    | *F |    |                        |     |     |     |     |
|         | 6M  |                      | G  |    |    |    |                        |     |     |     |     |
|         | 14M |                      |    |    | F  |    |                        |     |     |     |     |
| R-360   | 1M  |                      |    |    |    |    |                        |     |     |     |     |
|         | 3M  |                      |    | *G |    |    |                        |     |     |     |     |
|         | 6M  |                      |    | G  |    |    |                        |     |     |     |     |
|         | 12M |                      |    | G  |    |    | T                      | L   |     |     |     |
| R06-020 | 1M  |                      |    |    |    |    |                        |     |     |     |     |
|         | 3M  |                      | *K |    |    |    |                        |     |     |     |     |
|         | 11M |                      |    | G  | R  |    |                        |     |     |     |     |
|         |     |                      |    |    |    |    |                        |     |     |     |     |
| R06-033 | 1M  |                      |    |    |    |    |                        |     |     |     |     |
|         | 3M  |                      | *G |    |    |    |                        |     |     |     |     |
|         | 6M  |                      |    | *G |    |    |                        |     |     |     |     |
|         | 14M |                      |    | G  |    | *E |                        |     |     | K   | E   |
| R03-021 | 1M  |                      |    |    |    |    |                        |     |     |     |     |
|         | 3M  |                      |    |    | *F |    |                        |     |     |     |     |
|         | 14M |                      | G  |    |    |    |                        | R   |     |     |     |
| R03-016 | 1M  | *K                   |    | *R |    |    |                        |     |     |     |     |
|         | 4M  | K                    |    |    |    |    |                        |     |     |     |     |
|         | 12M | K                    |    |    |    |    |                        |     |     |     |     |

**Figure 9. Predominant non-synonymous mutations in Nef<sub>35-49</sub>-coding and Nef<sub>115-129</sub>-coding regions of viral cDNAs in D<sup>+</sup> animals after SIVmac239 challenge.** Amino acid substitutions are shown. Detection of similar levels of wild-type and mutant sequences at the residue is indicated by asterisks. Samples for this analysis were unavailable in macaque R01-009. doi:10.1371/journal.pone.0054300.g009

unvaccinated animals eliciting Nef<sub>115-129</sub>-specific CD8<sup>+</sup> T-cell responses. These mutations were also detected in two of three vaccinated animals eliciting Nef<sub>115-129</sub>-specific CD8<sup>+</sup> T-cell responses.

We also analyzed viral gag sequences to see the effect of Gag-specific CD8<sup>+</sup> T-cell pressure on viral genome mutations in vaccinated animals (data not shown). Our previous study [35] showed rapid selection of a mutation leading to a glutamine (Q)-to-lysine (K) change at the 58th residue in Gag (Q58K) at week 5 in vaccinated macaque R01-009, although no more samples were available for this sequencing analysis. This Q58K mutation results in escape from Gag<sub>50-65</sub>-specific CD8<sup>+</sup> T-cell recognition. In the present study, macaque R03-016 showed rapid selection of a mutation leading to a K-to-asparagine (N) change at the 478th residue in Gag in 1 month. These results may reflect rapid disappearance of detectable plasma viremia in 1 or 2 months in these two vaccinees. Macaque R06-020 showed selection of a gag

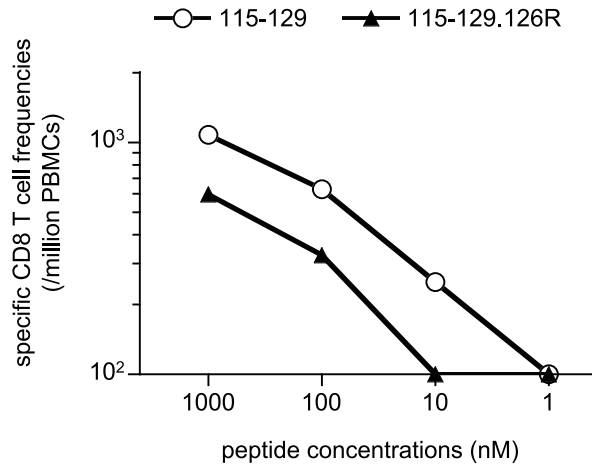

**Figure 10. IFN- $\gamma$  induction in CD8<sup>+</sup> T cells after stimulation with the wild-type or the mutant peptide.** PBMCs obtained at week 31 from macaque R06-033 were stimulated by coculture with B-LCL pulsed with indicated concentrations of the wild-type Nef<sub>115-129</sub> peptide (open circles, 115-129, LAIDMSHFIIKEKGGI) or the mutant Nef<sub>115-129</sub> peptide with a K126R alteration (closed triangles, 115-129.126R, LAIDMSHFIIKERGGI). doi:10.1371/journal.pone.0054300.g010

mutation in 3 months, while other two vaccinees (R06-033 and R03-021) selected no gag mutation in the early phase.

**Discussion**

HIV infection in humans with polymorphic MHC-I genotypes induces various patterns of viral antigen-specific CD8<sup>+</sup> T-cell responses. Previous studies have found several protective MHC-I alleles associated with lower viral loads and slower disease progression in HIV/SIV infection [7,13,14,16,17]. Elucidation of the mechanisms of viral control associated with individual protective MHC-I alleles would contribute to HIV cure and vaccine-based prevention. Because CD8<sup>+</sup> T-cell responses specific for some MHC-I-restricted epitopes can be affected by those specific for other MHC-I-restricted epitopes due to immunodominance [29,46,47], macaque groups sharing MHC-I genotypes at the haplotype level are useful for the analysis of cooperation of multiple epitope-specific CD8<sup>+</sup> T-cell responses. Previously, we reported a group of Burmese rhesus macaques sharing MHC-I haplotype 90-120-1a (A), which dominantly induce Gag-specific CD8<sup>+</sup> T-cell responses and tend to show slower disease progression after SIVmac239 challenge [21]. In the present study, we presented another type of protective MHC-I haplotype, which is not associated with dominant Gag-specific CD8<sup>+</sup> T-cell responses. Significant reduction of viral loads in unvaccinated macaques possessing this D haplotype compared to those in D<sup>-</sup> macaques was observed after 6 months. Analysis of SIV infection in macaques sharing this protective MHC-I haplotype would lead to understanding of CD8<sup>+</sup> T-cell cooperation for viral control.

Analyses of antigen-specific CD8<sup>+</sup> T-cell responses after SIVmac239 challenge indicate that this MHC-I haplotype D is associated with predominant Nef-specific CD8<sup>+</sup> T-cell responses. Nef-specific CD8<sup>+</sup> T-cell responses were efficiently induced in all SIV controllers, whereas Gag-specific CD8<sup>+</sup> T-cell responses were dominant in only one of them. We found Nef<sub>35-49</sub>-specific and Nef<sub>115-129</sub>-specific CD8<sup>+</sup> T-cell responses shared in D<sup>+</sup> animals. We were unable to determine the MHC-I alleles restricting these epitopes, but these responses are not usually induced in our



previous D<sup>-</sup> cohorts and considered to be associated with this MHC-I haplotype D.

Sequencing analysis of viral genomes showed rapid selection of mutations in the Nef<sub>36–44</sub>-coding region within 3 months in all the D<sup>+</sup> animals. This is consistent with our results that Nef<sub>35–49</sub>-specific CD8<sup>+</sup> T-cell responses were mostly induced in the early phase but undetectable in the chronic phase. These mutations were not consistently selected in our previous D<sup>-</sup> cohorts and thus considered as MHC-I haplotype D-associated mutations. This suggests strong selective pressure by Nef<sub>35–49</sub>-specific CD8<sup>+</sup> T-cell responses in the acute phase of SIVmac239 infection in D<sup>+</sup> macaques, although it remains undetermined whether these mutations result in viral escape from Nef<sub>35–49</sub>-specific CD8<sup>+</sup> T-cell recognition.

Nef<sub>115–129</sub>-specific CD8<sup>+</sup> T-cell responses were detected in six D<sup>+</sup> animals. In five of them, nonsynonymous mutations in the Nef<sub>119–126</sub>-coding region were observed in the chronic phase. At least, we confirmed viral escape from Nef<sub>115–129</sub>-specific CD8<sup>+</sup> T-cell recognition by a mutation leading to a K-to-arginine (R) (K126R) substitution at Nef residue 126 (Fig. 10). The number of nonsynonymous substitutions per the number of sites estimated to be nonsynonymous (dN) exceeded that estimated to be synonymous (dS) during the evolution process of Nef<sub>115–129</sub>-coding region, but the value did not show statistically significant difference from that of neutral selection. Among three unvaccinated animals that controlled SIV replication without dominant Gag-specific CD8<sup>+</sup> T-cell responses, amino acid substitutions in the Nef<sub>119–126</sub>-coding region were observed in a year in macaques R06-034 and R-360 but after 2 years in macaque R05-006. The former two animals tended to show earlier increases in plasma viral loads in the chronic phase, while the latter R05-006 maintained higher frequencies of Nef<sub>115–129</sub>-specific CD8<sup>+</sup> T-cell responses. Nef<sub>115–129</sub>-specific CD8<sup>+</sup> T-cell responses were efficient in the chronic phase in vaccinated controllers R03-021 and R03-016 but decreased in R06-033 that failed to contain SIV replication. Although a possible effect of this haplotype-associated factors other than CD8<sup>+</sup> T-cell responses such as NK activity on SIV infection [48,49,50] remains undetermined, these results imply involvement of Nef-specific CD8<sup>+</sup> T-cell responses in the SIV control associated with MHC-I haplotype D.

Unvaccinated macaque R08-005 dominantly elicited Gag antigen-specific CD8<sup>+</sup> T-cell responses and showed rapid selection of a mutation encoding Gag 257 residue, which was not observed in any other D<sup>+</sup> animals. Nef-specific CD8<sup>+</sup> T-cell responses were detectable only at week 2 in the acute phase (data not shown) and

a mutation in the Nef<sub>42</sub>-coding region was rapidly selected. It is speculated that those dominant Gag-specific CD8<sup>+</sup> T-cell responses associated with the second, non-D MHC-I haplotype were effective in this animal. Nef<sub>35–49</sub>-specific CD8<sup>+</sup> T-cell responses may not be efficient due to immunodominance but exert some suppressive pressure on viral replication.

DNA/SeV-Gag vaccination resulted in earlier reduction of viral loads after SIV challenge. Vaccinees showed significantly lower viral loads at 3 months than those in unvaccinated animals. Gag-specific CD8<sup>+</sup> T-cell responses were elicited at week 2 in all the vaccinees but not in the unvaccinated except for one animal R08-005. No *gag* mutations were shared in the vaccinees in the acute phase, but three of them showed rapid selection of individual nonsynonymous mutations in *gag*. Rapid selection of mutations in the Nef<sub>36–44</sub>-coding region was consistently detected even in these vaccinees. These results suggest broader CD8<sup>+</sup> T-cell responses consisting of dominant vaccine antigen Gag-specific and inefficient naive-derived Nef-specific ones in the acute phase. In three vaccinated animals, Gag-specific CD8<sup>+</sup> T-cell responses became lower or undetectable, and instead, Nef-specific CD8<sup>+</sup> T-cell responses became predominant in the chronic phase.

In summary, we found a protective MHC-I haplotype not associated with dominant Gag-specific CD8<sup>+</sup> T-cell responses in SIVmac239 infection. Our results in D<sup>+</sup> macaques suggest suppressive pressure by Nef<sub>35–49</sub>-specific and Nef<sub>115–129</sub>-specific CD8<sup>+</sup> T-cell responses on SIV replication, contributing to reduction in set-point viral loads. DNA/SeV-Gag-vaccinated D<sup>+</sup> animals induced Gag-specific CD8<sup>+</sup> T-cell responses in addition to Nef-specific ones after SIV challenge, resulting in earlier containment of SIV replication. This study presents a pattern of SIV control with involvement of non-Gag antigen-specific CD8<sup>+</sup> T-cell responses, contributing to accumulation of our knowledge on HIV/SIV control mechanisms.

## Acknowledgments

We thank F. Ono, K. Oto, K. Hanari, K. Komatsuzaki, M. Hamano, H. Akari, and Y. Yasutomi for their assistance in animal experiments.

## Author Contributions

Performed animal experiments: HS TM TI YK. Performed MHC-I typing: TKN AK. Conceived and designed the experiments: NT TM. Performed the experiments: NT TN YT HY AT. Analyzed the data: NT HY T. Shiino TM. Contributed reagents/materials/analysis tools: MI AI HH T. Shu MH. Wrote the paper: NT TM.

## References

- Borrow P, Lewicki H, Hahn BH, Shaw GM, Oldstone MB (1994) Virus-specific CD8<sup>+</sup> cytotoxic T-lymphocyte activity associated with control of viremia in primary human immunodeficiency virus type 1 infection. *J Virol* 68: 6103–6110.
- Koup RA, Safrit JT, Cao Y, Andrews CA, McLeod G, et al. (1994) Temporal association of cellular immune responses with the initial control of viremia in primary human immunodeficiency virus type 1 syndrome. *J Virol* 68: 4650–4655.
- Matano T, Shibata R, Siemon C, Connors M, Lane HC, et al. (1998) Administration of an anti-CD8 monoclonal antibody interferes with the clearance of chimeric simian/human immunodeficiency virus during primary infections of rhesus macaques. *J Virol* 72: 164–169.
- Jin X, Bauer DE, Tuttleton SE, Lewin S, Gettice A, et al. (1999) Dramatic rise in plasma viremia after CD8<sup>+</sup> T cell depletion in simian immunodeficiency virus-infected macaques. *J Exp Med* 189: 991–998.
- Schmitz JE, Kuroda MJ, Santra S, Sasseville VG, Simon MA, et al. (1999) Control of viremia in simian immunodeficiency virus infection by CD8<sup>+</sup> lymphocytes. *Science* 283: 857–860.
- Carrington M, Nelson GW, Martin MP, Kissner T, Vlahov D, et al. (1999) HLA and HIV-1: heterozygote advantage and B\*35-Cw\*04 disadvantage. *Science* 283: 1748–1752.
- Migueles SA, Sabbaghian MS, Shupert WL, Bettinotti MP, Marincola FM, et al. (2000) HLA B\*5701 is highly associated with restriction of virus replication in a subgroup of HIV-infected long term nonprogressors. *Proc Natl Acad Sci USA* 97: 2709–2714.
- Tang J, Tang S, Lobashevsky E, Myracle AD, Fideli U, et al. (2002) Favorable and unfavorable HLA class I alleles and haplotypes in Zambians predominantly infected with clade C human immunodeficiency virus type 1. *J Virol* 76: 8276–8284.
- Kiepiela P, Leslie AJ, Honeyborne I, Ramduth D, Thobakgale C, et al. (2004) Dominant influence of HLA-B in mediating the potential co-evolution of HIV and HLA. *Nature* 432: 769–775.
- Leslie A, Matthews PC, Listgarten J, Carlson JM, Kadie C, et al. (2010) Additive contribution of HLA class I alleles in the immune control of HIV-1 infection. *J Virol* 84: 9879–9888.
- Altfeld M, Addo MM, Rosenberg ES, Hecht FM, Lee PK, et al. (2003) Influence of HLA-B57 on clinical presentation and viral control during acute HIV-1 infection. *AIDS* 17: 2581–2591.
- Altfeld M, Kalife ET, Qi Y, Streeck H, Lichtenfeld M, et al. (2006) HLA alleles associated with delayed progression to AIDS contribute strongly to the initial CD8<sup>+</sup> T cell response against HIV-1. *PLoS Med* 3: e403.
- Goulder PJ, Watkins DI (2008) Impact of MHC class I diversity on immune control of immunodeficiency virus replication. *Nat Rev Immunol* 8: 619–630.

14. Muhl T, Krawczak M, Ten Haaf P, Hunsmann G, Sauer mann U (2002) MHC class I alleles influence set-point viral load and survival time in simian immunodeficiency virus-infected rhesus monkeys. *J Immunol* 169: 3438–3446.
15. Mothe BR, Weinfurter J, Wang C, Rehrauer W, Wilson N, et al. (2003) Expression of the major histocompatibility complex class I molecule Mamu-A\*01 is associated with control of simian immunodeficiency virus SIVmac239 replication. *J Virol* 77: 2736–2740.
16. Yant LJ, Friedrich TC, Johnson RC, May GE, Maness NJ, et al. (2006) The high-frequency major histocompatibility complex class I allele Mamu-B\*17 is associated with control of simian immunodeficiency virus SIVmac239 replication. *J Virol* 80: 5074–5077.
17. Loffredo JT, Maxwell J, Qi Y, Glidden CE, Borchardt GJ, et al. (2007) Mamu-B\*08-positive macaques control simian immunodeficiency virus replication. *J Virol* 81: 8827–8832.
18. Edwards BH, Bansal A, Sabbaj S, Bakari J, Mulligan MJ, et al. (2002) Magnitude of functional CD8+ T-cell responses to the gag protein of human immunodeficiency virus type 1 correlates inversely with viral load in plasma. *J Virol* 76: 2298–2305.
19. Zuniga R, Lucchetti A, Galvan P, Sanchez S, Sanchez C, et al. (2006) Relative dominance of Gag p24-specific cytotoxic T lymphocytes is associated with human immunodeficiency virus control. *J Virol* 80: 3122–3125.
20. Kiepiela P, Ngumbela K, Thobakgale C, Ramduth D, Honeyborne I, et al. (2007) CD8+ T-cell responses to different HIV proteins have discordant associations with viral load. *Nat Med* 13: 46–53.
21. Nomura T, Yamamoto H, Shiino T, Takahashi N, Nakane T, et al. (2012) Association of major histocompatibility complex class I haplotypes with disease progression after simian immunodeficiency virus challenge in Burmese rhesus macaques. *J Virol* 86: 6481–6490.
22. Schneidewind A, Brockman MA, Yang R, Adam RI, Li B, et al. (2007) Escape from the dominant HLA-B27-restricted cytotoxic T-lymphocyte response in Gag is associated with a dramatic reduction in human immunodeficiency virus type 1 replication. *J Virol* 81: 12382–12393.
23. Emu B, Sinclair E, Hatano H, Ferre A, Shacklett B, et al. (2008) HLA class I-restricted T-cell responses may contribute to the control of human immunodeficiency virus infection, but such responses are not always necessary for long-term virus control. *J Virol* 82: 5398–5407.
24. Miura T, Brockman MA, Schneidewind A, Lobritz M, Pereyra F, et al. (2009) HLA-B57/B\*5801 human immunodeficiency virus type 1 elite controllers select for rare gag variants associated with reduced viral replication capacity and strong cytotoxic T-lymphocyte recognition. *J Virol* 83: 2743–2755.
25. Leslie AJ, Pfafferoth KJ, Chetty P, Draenert R, Addo MM, et al. (2004) HIV evolution: CTL escape mutation and reversion after transmission. *Nat Med* 10: 282–289.
26. Martinez-Picado J, Prado JG, Fry EE, Pfafferoth K, Leslie A, et al. (2006) Fitness cost of escape mutations in p24 Gag in association with control of human immunodeficiency virus type 1. *J Virol* 80: 3617–3623.
27. Crawford H, Prado JG, Leslie A, Hue S, Honeyborne I, et al. (2007) Compensatory mutation partially restores fitness and delays reversion of escape mutation within the immunodominant HLA-B\*5703-restricted Gag epitope in chronic human immunodeficiency virus type 1 infection. *J Virol* 81: 8346–8351.
28. Friedrich TC, Valentine LE, Yant LJ, Rakasz EG, Piskowski SM, et al. (2007) Subdominant CD8+ T-cell responses are involved in durable control of AIDS virus replication. *J Virol* 81: 3465–3476.
29. Loffredo JT, Bean AT, Beal DR, Leon EJ, May GE, et al. (2008) Patterns of CD8+ immunodominance may influence the ability of Mamu-B\*08-positive macaques to naturally control simian immunodeficiency virus SIVmac239 replication. *J Virol* 82: 1723–1738.
30. Maness NJ, Yant LJ, Chung C, Loffredo JT, Friedrich TC, et al. (2008) Comprehensive immunological evaluation reveals surprisingly few differences between elite controller and progressor Mamu-B\*17-positive simian immunodeficiency virus-infected rhesus macaques. *J Virol* 82: 5245–5254.
31. Valentine LE, Loffredo JT, Bean AT, Leon EJ, MacNair CE, et al. (2009) Infection with “escaped” virus variants impairs control of simian immunodeficiency virus SIVmac239 replication in Mamu-B\*08-positive macaques. *J Virol* 83: 11514–11527.
32. Budde ML, Greene JM, Chin EN, Ericson AJ, Scarlotta M, et al. (2012) Specific CD8+ T cell responses correlate with control of simian immunodeficiency virus replication in Mauritian cynomolgus macaques. *J Virol* 86: 7596–7604.
33. Mudd PA, Martins MA, Ericson AJ, Tully DC, Power KA, et al. (2012) Vaccine-induced CD8+ T cells control AIDS virus replication. *Nature* 491: 129–133.
34. Naruse TK, Chen Z, Yanagida R, Yamashita T, Saito Y, et al. (2010) Diversity of MHC class I genes in Burmese-origin rhesus macaques. *Immunogenetics* 62: 601–611.
35. Matano T, Kobayashi M, Igarashi H, Takeda A, Nakamura H, et al. (2004) Cytotoxic T lymphocyte-based control of simian immunodeficiency virus replication in a preclinical AIDS vaccine trial. *J Exp Med* 199: 1709–1718.
36. Kawada M, Tsukamoto T, Yamamoto H, Iwamoto N, Kurihara K, et al. (2008) Gag-specific cytotoxic T-lymphocyte-based control of primary simian immunodeficiency virus replication in a vaccine trial. *J Virol* 82: 10199–10206.
37. Tanaka-Takahashi Y, Yasunami M, Naruse T, Hinohara K, Matano T, et al. (2007) Reference strand-mediated conformation analysis-based typing of multiple alleles in the rhesus macaque MHC class I Mamu-A and Mamu-B loci. *Electrophoresis* 28: 918–924.
38. Shibata R, Maldarelli F, Siemon C, Matano T, Parta M, et al. (1997) Infection and pathogenicity of chimeric simian-human immunodeficiency viruses in macaques: determinants of high virus loads and CD4 cell killing. *J Infect Dis* 176: 362–373.
39. Li HO, Zhu YF, Asakawa M, Kuma H, Hirata T, et al. (2000) A cytoplasmic RNA vector derived from nontransmissible Sendai virus with efficient gene transfer and expression. *J Virol* 74: 6564–6569.
40. Takeda A, Igarashi H, Nakamura H, Kano M, Iida A, et al. (2003) Protective efficacy of an AIDS vaccine, a single DNA priming followed by a single booster with a recombinant replication-defective Sendai virus vector, in a macaque AIDS model. *J Virol* 77: 9710–9715.
41. Kestler HW III, Ringler DJ, Mori K, Panicali DL, Sehgal PK, et al. (1991) Importance of the nef gene for maintenance of high virus loads and for development of AIDS. *Cell* 65: 651–662.
42. Yamamoto H, Kawada M, Takeda A, Igarashi H, Matano T (2007) Post-infection immunodeficiency virus control by neutralizing antibodies. *PLoS One* 2: e540.
43. Iwamoto N, Tsukamoto T, Kawada M, Takeda A, Yamamoto H, et al. (2010) Broadening of CD8+ cell responses in vaccine-based simian immunodeficiency virus controllers. *AIDS* 24: 2777–2787.
44. Voss G, Nick S, Stahl-Hennig C, Ritter K, Hunsmann G (1992) Generation of macaque B lymphoblastoid cell lines with simian Epstein-Barr-like viruses: transformation procedure, characterization of the cell lines and occurrence of simian foamy virus. *J Virol Methods* 39: 185–195.
45. Kawada M, Igarashi H, Takeda A, Tsukamoto T, Yamamoto H, et al. (2006) Involvement of multiple epitope-specific cytotoxic T-lymphocyte responses in vaccine-based control of simian immunodeficiency virus replication in rhesus macaques. *J Virol* 80: 1949–1958.
46. Tenzer S, Wee E, Burgevin A, Stewart-Jones G, Friis L, et al. (2009) Antigen processing influences HIV-specific cytotoxic T lymphocyte immunodominance. *Nat Immunol* 10: 636–646.
47. Ishii H, Kawada M, Tsukamoto T, Yamamoto H, Matsuoka S, et al. (2012) Impact of vaccination on cytotoxic T lymphocyte immunodominance and cooperation against simian immunodeficiency virus replication in rhesus macaques. *J Virol* 86: 738–745.
48. Flores-Villanueva PO, Yunis EJ, Delgado JC, Vittinghoff E, Buchbinder S, et al. (2001) Control of HIV-1 viremia and protection from AIDS are associated with HLA-Bw4 homozygosity. *Proc Natl Acad Sci USA* 98: 5140–5145.
49. Martin MP, Gao X, Lee JH, Nelson GW, Detels R, et al. (2002) Epistatic interaction between KIR3DS1 and HLA-B delays the progression to AIDS. *Nat Genet* 31: 429–434.
50. Martin MP, Qi Y, Gao X, Yamada E, Martin JN, et al. (2007) Innate partnership of HLA-B and KIR3DL1 subtypes against HIV-1. *Nat Genet* 39: 733–740.
